# Supplementary material for: Familial Recurrent Myocarditis Triggered by Exercise in Patients With a Truncating Variant of the Desmoplakin Gene
Source: PubMed Central journal article supplement — J Am Heart Assoc. 2020 May 15;9(10):e015289. doi: 10.1161/JAHA.119.015289 (PMC7660888; doi:10.1161/jaha.119.015289), 2020-05-15
Supplement: JAH3-9-e015289-s001.pdf [file JAH3-9-e015289-s001.pdf]

# **SUPPLEMENTAL MATERIAL**

**Table S1****Immunological studies****RNA sequencing analysis of normal human PBMCs**

Values are given as RPKM

| Transcript | CD3 <sup>+</sup> | CD4+  | CD8+  | T-reg | CD19+ | CD14+ | CD56+ |
|------------|------------------|-------|-------|-------|-------|-------|-------|
| DSP        | 0,013            | 0,010 | 0,000 | 0,000 | 0,086 | 0,000 | 0,000 |

**FACS analyses on PBMCs from DSP mutation carrier**

| Parameter                  | Unit | Value   | Reference range |
|----------------------------|------|---------|-----------------|
| <b>B Cells</b>             |      |         |                 |
| naive B cells              | /nl  | 0.247   |                 |
| naive B cells              | %    | 82.7    | 63.3-88.0       |
| marginal zone-like B cells | /nl  | 0.015   |                 |
| marginal zone-like B cells | %    | 5.2 P ↓ | 6.1-16.9        |
| IgM only memory B cells    | /nl  | 0.002   |                 |
| IgM only memory B cells    | %    | 0.7     |                 |
| switched memory B cells    | /nl  | 0.012   |                 |
| switched memory B cells    | %    | 4.0 P ↓ | 4.1-18.7        |
| transitional B cells       | /nl  | 0.010   |                 |
| transitional B cells       | %    | 3.2     | 0.6-3.4         |
| CD21low CD38low B cells    | /nl  | 0.005   |                 |
| CD21low CD38low B cells    | %    | 1.7     | 0.9-7.6         |
| switched plasmablasts      | /nl  | 0.004   |                 |
| switched plasmablasts      | %    | 1.3     | 0.4-3.6         |
| CD19+ B cells              | /nl  | 0.30    | 0.10-0.40       |
| <b>NK Cells</b>            |      |         |                 |
| NK cells                   | /nl  | 0.25    | 0.10-0.40       |

|                                                              |     |                    |           |
|--------------------------------------------------------------|-----|--------------------|-----------|
| NK cells, % of lymphocytes                                   | %   | 9                  | 5-25      |
| Naive CD45RA+, % of CD4+                                     | %   | 66                 |           |
| <b>T Cells</b>                                               |     |                    |           |
| memory CD45RO+, % of CD4+                                    | %   | 34                 |           |
| naive CD45RA+, % of CD8+                                     | %   | 67                 |           |
| memory CD45RO+, % of CD8+                                    | %   | 33                 |           |
| $\gamma/\delta$ TCR+ T cells, relative                       | %   | 22 P $\uparrow$    | < 10      |
| $\alpha/\beta$ TCR+ T cells, relative                        | %   | 78 P $\downarrow$  | > 90      |
| $\gamma/\delta$ TCR+ T cells                                 | /nl | 0.50               |           |
| $\alpha/\beta$ TCR+ T cells                                  | /nl | 1.80               |           |
| TCR $\alpha\beta$ + CD4- CD8-, % of TCR $\alpha\beta$ + CD3+ | %   | 1.40               | < 2.00    |
| CD19+ B cells, % of lymphocytes                              | %   | 10                 | 5-25      |
| CD4/CD8 ratio                                                |     | 0.5 P $\downarrow$ | 1.1-3.0   |
| CD8- CD4- T cells, % of T cells                              | %   | 17.30 P $\uparrow$ | < 15.00   |
| CD8+ CD4+ T cells, % of T cells                              | %   | 0.61               | < 10.00   |
| CD3+ T cells                                                 | /nl | 2.30               | 0.80-3.50 |
| CD3+ T cells, % of lymphocytes                               | %   | 81                 | 60-85     |
| CD4+ T cells                                                 | /nl | 0.65               | 0.50-1.20 |
| CD4+ T cells, % of lymphocytes                               | %   | 23 P $\downarrow$  | 30-60     |
| CD4+ % T cells                                               | %   | 28.19              |           |
| CD8+ T cells                                                 | /nl | 1.24 P $\uparrow$  | 0.30-0.80 |
| CD8+ T cells, % of lymphocytes                               | %   | 43                 | 20-40     |
| CD8+ % T cells                                               | %   | 53.89              |           |
| <b>Lymphocyte proliferation/function</b>                     |     |                    |           |
| PHA, patient                                                 | cpm | 54479              |           |
| PHA, healthy control                                         | cpm | 31723              |           |
| IL-2, patient                                                | cpm | 5795               |           |
| IL-2, healthy control                                        | cpm | 6015               |           |
| anti-CD3, patient                                            | cpm | 19591              |           |
| anti-CD3, healthy control                                    | cpm | 5833               |           |
| PWM, patient                                                 | cpm | 4831               |           |
| PWM, healthy control                                         | cpm | 5482               |           |

|                                |     |        |        |
|--------------------------------|-----|--------|--------|
| SAC, patient                   | cpm | 1096   |        |
| SAC, healthy control           | cpm | 2003   |        |
| Tetanus, patient               | cpm | 810    |        |
| Tetanus, healthy control       | cpm | 94     |        |
| Candida, patient               | cpm | 1763   |        |
| Candida, healthy control       | cpm | 339    |        |
| Diphtherie, patient            | cpm | 30     |        |
| Diphtherie, healthy control    | cpm | 31     |        |
| Medium, patient                | cpm | 31     |        |
| Medium, healthy control        | cpm | 25     |        |
| Tetanus SI, patient            |     | 26.1   | > 3.0  |
| Tetanus SI, healthy control    |     | 3.8    | > 3.0  |
| Candida SI, patient            |     | 56.9   | > 3.0  |
| Candida SI, healthy control    |     | 13.6   | > 3.0  |
| Diphtherie SI, patient         |     | 1.0 P- | > 3.0  |
| Diphtherie SI, healthy control |     | 1.2 P- | > 3.0  |
| PHA SI, patient                |     | 1027.9 | > 50.0 |
| PHA SI, healthy control        |     | 991.3  | > 50.0 |
| IL-2 SI, patient               |     | 109.3  | > 30.0 |
| IL-2 SI, healthy control       |     | 188.0  | > 30.0 |
| Anti-CD3 SI, patient           |     | 369.6  | > 30.0 |
| Anti-CD3 SI, healthy control   |     | 182.3  | > 30.0 |
| PWM SI, patient                |     | 91.2   | > 20.0 |
| PWM SI, healthy control        |     | 171.3  | > 20.0 |
| SAC SI, patient                |     | 20.7   | > 10.0 |
| SAC SI, healthy control        |     | 62.6   | > 10.0 |
| Medium, patient                | cpm | 53     |        |
| Medium, healthy control        | cpm | 32     |        |

CD8+ lymphocytosis, relative reduction of CD4+ cells, decreased CD4+/CD8+ ratio; increase of  $\gamma\delta$  T cells vs.  $\alpha\beta$  T cells; reduced switched mature B cells, delayed B cell maturation.

Normal absolute numbers of CD4+ cells, T cells, B cells, NK cells, monocytes, and granulocytes; normal fraction of CD45RA+ CCR7+ naive T cells; lymphocytes display normal proliferation reactions towards 2/3 recall antigens and all tested T and B cell mitogens compared to a healthy control subject, and no evidence for defective signaling.

### Serum autoantibody screening of DSP mutation carrier

| Parameter                     | Unit  | Value    | Reference range |
|-------------------------------|-------|----------|-----------------|
| anti-myosin_IgM               | titer | 1:160    | < 1:40          |
| anti-myosin_IgG               | titer | negative | < 1:40          |
| anti-troponin I_IgM           | titer | 1:80     | < 1:40          |
| anti-troponin I_IgG           | titer | 1:40     | < 1:40          |
| antinuclear Ab (ANA)/HEp-2-IF | titer | negative | < 1:160         |
| anti-ds-DNA-Ab/Crithidien-IF  | titer | negative | < 1:10          |

**Table S2**

**Cardiac magnetic resonance imaging (CMR) of brothers heterozygous for DSP truncating mutation Arg1458Ter**

|                                                                                                                                                  | Patient 12                   |                                        | Patient 11                                 |                                            |
|--------------------------------------------------------------------------------------------------------------------------------------------------|------------------------------|----------------------------------------|--------------------------------------------|--------------------------------------------|
| <b>Date</b>                                                                                                                                      | 01-04-2017                   | 04-10-2017                             | 18-05-2017                                 | 06-09-2017                                 |
| <b>LV-EF (%)</b>                                                                                                                                 | 59                           | 47                                     | 65                                         | 64                                         |
| <b>LV-EDV (ml/m<sup>2</sup>)</b>                                                                                                                 | 103 (62-102)                 | 104 (62-102)                           | 88 (82-113)                                | 120 (82-113)                               |
| <b>LV-ESV (ml/m<sup>2</sup>)</b>                                                                                                                 | 42 (18-39)                   | 57 (18-39)                             | 29 (9-41)                                  | 44 (9-41)                                  |
| <b>LV myocardial mass (g/m<sup>2</sup>)</b>                                                                                                      | 83 (42-98)                   | 73 (42-98)                             | NA                                         | 88 (45-81)                                 |
| <b>T2 (Edema)</b>                                                                                                                                | normal<br>1,6/1,5 (<2,0)     | normal<br>1,8/1,9 (<2,0)               | borderline<br>2,0/2,2 (<2,0)               | borderline<br>2,2/1,8 (<2,0)               |
| <b>Early enhancement</b>                                                                                                                         | 2,8/5,2/5,0 (<5,0)           | <5,0                                   | 2,9/2,0/3,7 (<5,0)                         | 0,8/0,0 (< 5,0)                            |
| <b>Late gadolinium enhancement</b>                                                                                                               | subepicardial basal & apical | subepicardial postero-septal & lateral | subepicardial anterior, posterior & septal | subepicardial anterior, posterior & septal |
| <b>LVEDD (mm)</b>                                                                                                                                | 53<br>normal                 | 57<br>enlarged                         | 53<br>normal                               | 58<br>enlarged                             |
| <b>Dyskinesia</b>                                                                                                                                | none                         | postero-septal                         | none                                       | NA                                         |
| <b>Focal wall abnormalities</b>                                                                                                                  | none                         | none                                   | none                                       | none                                       |
| EDV = enddiastolic volume; EF = ejection fraction; ESV = endsystolic volume; LV = left ventricle; LVEDD = left ventricular enddiastolic diameter |                              |                                        |                                            |                                            |

**Table S3**

**Results of endomyocardial biopsies (EMB) of brothers heterozygous for DSP truncating mutation Arg1458Ter**

|                                                                               |  | <b>Patient 12</b> | <b>Patient 11</b>                      |                               |
|-------------------------------------------------------------------------------|--|-------------------|----------------------------------------|-------------------------------|
| <b>Date</b>                                                                   |  | 30-03-2017        | 22-05-2017                             | 20-09-2017                    |
| <b>Location</b>                                                               |  | RV                | RV                                     | RV                            |
| <b>Fibrosis</b>                                                               |  | None              | Moderate interstitial                  | Moderate interstitial         |
| <b>Myocyte necrosis</b>                                                       |  | None              | None                                   | None                          |
| <b>Immunohistochemistry</b><br>CD3<br>CD68/MHC II                             |  | Elevated<br>None  | Slightly elevated<br>Slightly elevated | Normal<br>Moderately elevated |
| <b>Myocardial viral <sup>§</sup> or other infectious <sup>§</sup> genomes</b> |  | None              | None                                   | None                          |

RV = right ventricle

<sup>§</sup> parvovirus B19 (PVB19), enteroviruses (EV), human herpesviruses (HHV6/7), Epstein-Barr virus (EBV), adenoviruses (AdV2/5), human cytomegalovirus (CMV), herpes simplex viruses (HSV1/2), varicella zoster virus (VZV), mumps virus

<sup>§</sup> Toxoplasma gondii, Borrelia burgdorferi

**Table S4****Screening of DSP mutation carriers for systemic or intramyocardial infections**

| <b>Serum antibodies</b>                 |                  |       |
|-----------------------------------------|------------------|-------|
| Enterovirus group (EV)                  | IgG ∅            | IgA ∅ |
| Adenovirus group (AdV)                  | IgG +            | IgM ∅ |
| Human herpesvirus 6 (HHV6)              | IgG +            | IgM ∅ |
| Herpes simplex virus types 1/2 (HSV1/2) | IgG +            | IgM ∅ |
| Parvovirus B19 (PVB19)                  | IgG ∅            | IgM ∅ |
| Varicella zoster virus (VZV)            | IgG +            | IgM ∅ |
| Human Cytomegalovirus (HCMV)            | IgG ∅            | IgM ∅ |
| Epstein-Barr virus (EBV)                | EBNA1, VCA IgG ∅ | IgM ∅ |
| Borrelia burgdorferi                    | IgG ∅            | IgM ∅ |
| Chlamydia pneumoniae                    | IgG ∅            | IgM ∅ |
| Mycoplasma pneumoniae                   | IgG +            | IgM ∅ |
| Haemophilus influenzae                  | IgG + 4.48 IE    |       |

| <b>Viral genomes in sputum</b>              |                 |
|---------------------------------------------|-----------------|
| Influenza A virus (H1, H3, H1N1)            | Multiplex PCR ∅ |
| Influenza B virus                           | Multiplex PCR ∅ |
| Respiratory syncytial virus (RSV) types A/B | Multiplex PCR ∅ |
| Coronavirus (HKU1, NL63, OC43)              | Multiplex PCR ∅ |
| Parainfluenza virus types 1-4               | Multiplex PCR ∅ |

| <b>Nested PCRs on patient PBMCs</b>      |        |
|------------------------------------------|--------|
| <i>Enteroviridae (RNA)</i>               |        |
| Coxsackie group A/B viruses              | nPCR ∅ |
| Echoviruses                              | nPCR ∅ |
| <i>Herpesviridae (dsDNA)</i>             |        |
| Herpes simplex virus types 1(2) (HSV1/2) | nPCR ∅ |
| Human herpesvirus type 6/7 (HHV6/7)      | nPCR ∅ |



|                                    |        |
|------------------------------------|--------|
| Epstein-Barr virus (EBV)           | nPCR Ø |
| Cytomegalovirus (HCMV)             | nPCR Ø |
| Varizella zoster virus (VZV)       | nPCR Ø |
| <i>Adenoviridae (dsDNA)</i>        |        |
| Adenovirus group (AdV)             | nPCR Ø |
| <i>Parvoviridae (ssDNA)</i>        |        |
| Parvovirus B19 (PVB19)             | nPCR Ø |
| <i>Non-viral infectious agents</i> |        |
| Chlamydia pneumonia                | nPCR Ø |
| Toxoplasma gondii                  | nPCR Ø |
| Borrelia burgdorferi               | nPCR Ø |
| Eubacteria                         | nPCR Ø |

|                                         |        |
|-----------------------------------------|--------|
| <b>Nested PCR on patient EMBs</b>       |        |
| <i>Enteroviridae (RNA)</i>              |        |
| Coxsackie group A/B viruses             | nPCR Ø |
| Echoviruses                             | nPCR Ø |
| <i>Herpesviridae (dsDNA)</i>            |        |
| Herpes simplex virus types 1/2 (HSV1/2) | nPCR Ø |
| Human herpesvirus type 6 (HHV6)         | nPCR Ø |
| Epstein-Barr virus (EBV)                | nPCR Ø |
| Cytomegalovirus (HCMV)                  | nPCR Ø |
| <i>Adenoviridae (dsDNA)</i>             |        |
| Adenovirus group (AdV)                  | nPCR Ø |
| <i>Parvoviridae (ssDNA)</i>             |        |
| Parvovirus B19 (PVB19)                  | nPCR Ø |
| <i>Non-viral infectious agents</i>      |        |
| Chlamydia pneumonia                     | nPCR Ø |
| Toxoplasma gondii                       | nPCR Ø |
| Borrelia burgdorferi                    | nPCR Ø |
| Eubacteria                              | nPCR Ø |

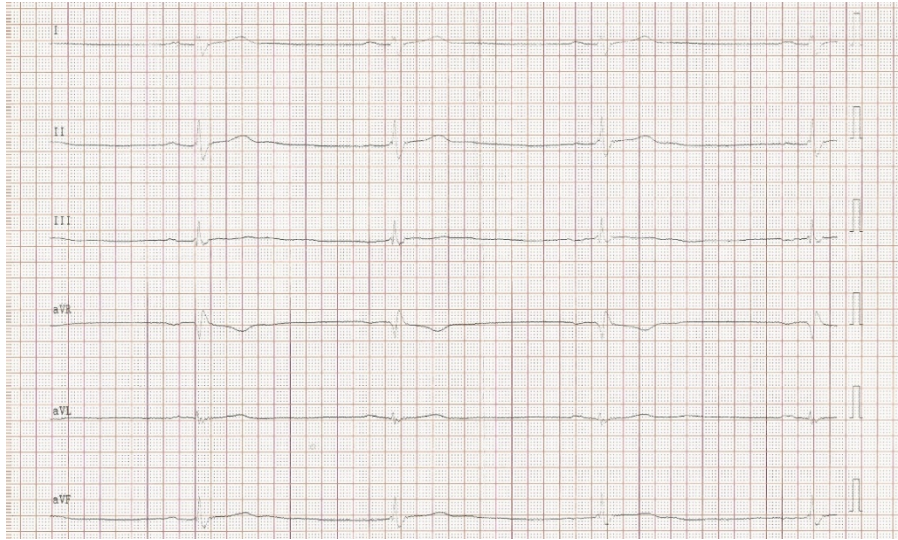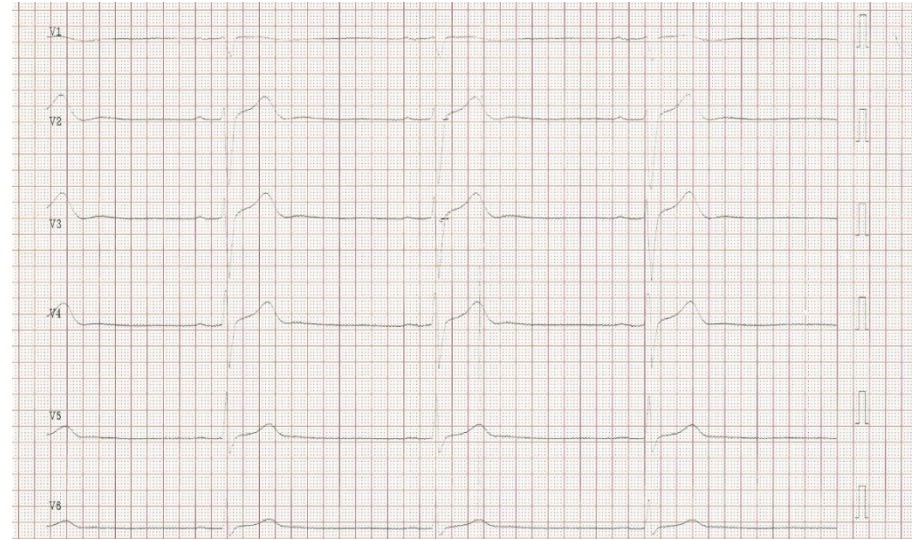

ECG of patient 11 at admission; 2017-05-15

**Figure S2. Echocardiography and cardiac MRI (cMRI) of the mother, patient 2, suffering from recurrent myocarditis.**

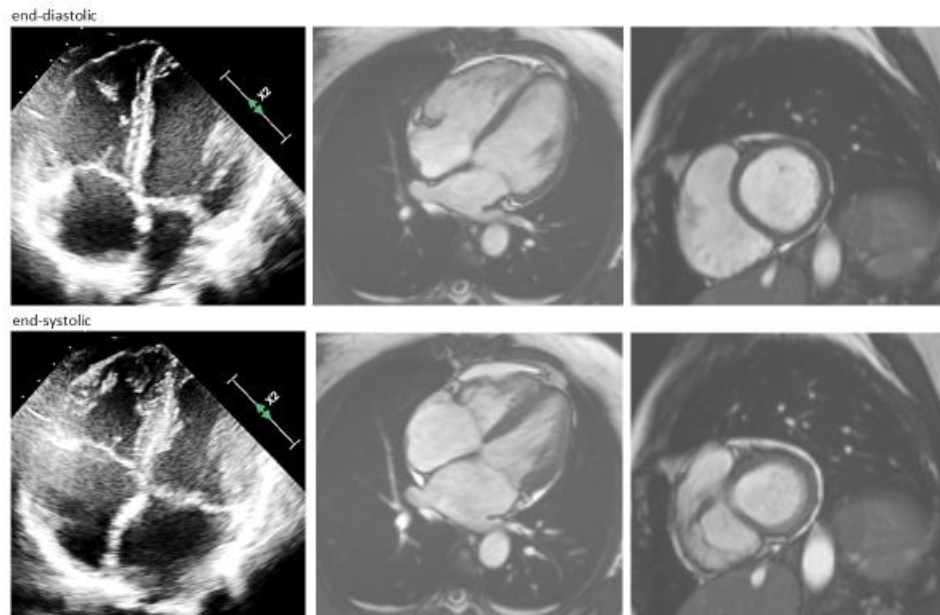

Upper panel from left to right, enddiastolic: echocardiographic 4-chamber view, cMRI 4-chamber view and 2- chamber view. Lower panel from left to right, end-systolic: echocardiographic 4-chamber view, cMRI 4-chamber view and 2- chamber view. Both children and her mother, who has not reported any clinical symptoms or signs resembling those of her sons, or suggesting heart failure or arrhythmias, carry the Arg1458Ter mutation of desmoplakin (DSP).

**Figure S3. DSP expression in myocardium and PBMCs of patients and controls.**

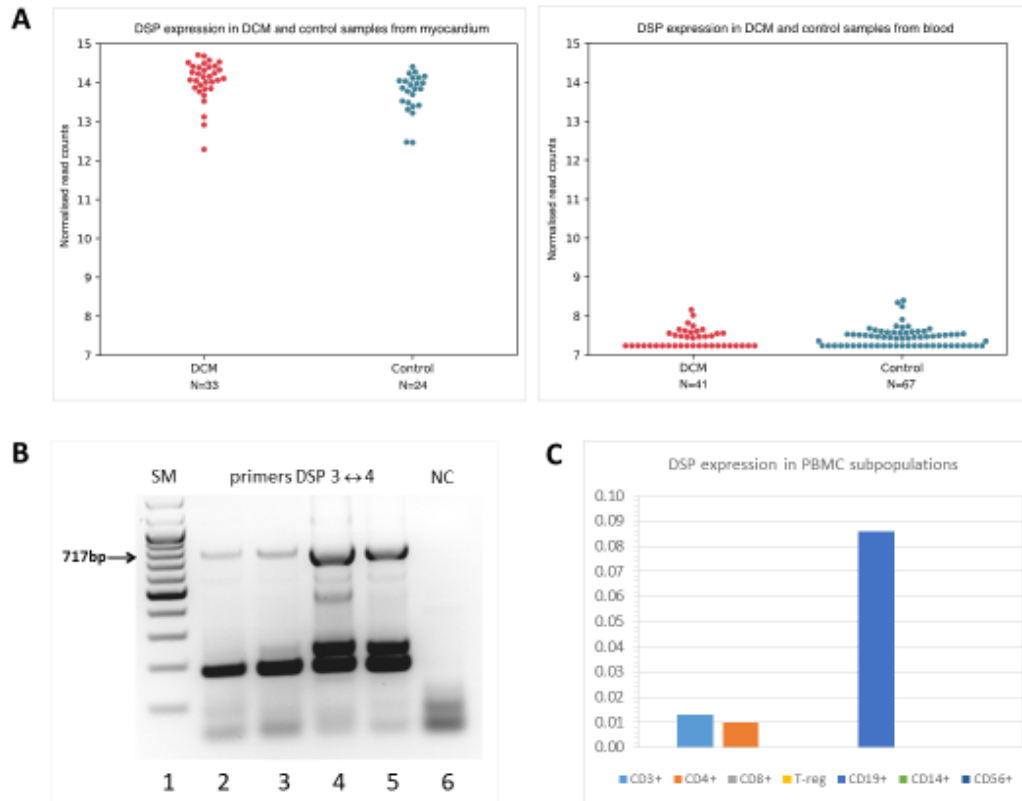

**A** The expression of DSP transcripts was tested in left ventricular myocardium and blood from patients with dilated cardiomyopathy (DCM) with RNAseq. DSP is highly expressed in heart tissue. In blood DSP was detected at low levels. No difference could be detected between DCM patients and controls. **B** In PBMCs derived from patient 11 DSP transcripts were detected by PCR. (lane 1: size marker, 100 bp ladder; lanes 2/3: cDNA from PBMCs of patient 11; lane 4: cDNA from PC3 cells; lane 5: cDNA from 293T cells; lane 6: negative control). **C** RNAseq analysis of sorted human PBMC subpopulations suggests that DSP transcripts are restricted to immune cell subtypes CD3<sup>+</sup>, CD4<sup>+</sup> and CD19<sup>+</sup>.

**Figure S4. Heterozygous variant NEXN p.Asp52His.**

| Nexlin Asp <sup>52</sup> His |                                                                             |          |                 |       |              |          |      |         |      |            |
|------------------------------|-----------------------------------------------------------------------------|----------|-----------------|-------|--------------|----------|------|---------|------|------------|
| Gene                         | Variant                                                                     | Function | Exonic function | dbSNP | gnomAD freq. | HC freq. | AF1  | DP Qual | Qual | Freq. alt. |
| NEXN                         | NP_653174.3:p.Asp52His<br>NM_144573.3:c.154G>C<br>NC_000001.10:g.7838377G>C | Exon     | Nonsynonymous   |       | 0            | 0.01     | Het. | 348     | 255  | 50,6       |

  

|                  |                                                                                                                                                                                                                                                                                                                                                                                                      |
|------------------|------------------------------------------------------------------------------------------------------------------------------------------------------------------------------------------------------------------------------------------------------------------------------------------------------------------------------------------------------------------------------------------------------|
| NP_653174.3      | 1 NNDKSGKAT LLESKVPFK ITVFKLNGD VNKVFAMQR AREKRNQRRS<br>50 RREKRRKQ YIREKWNRR EQEKEMLAS DEEDVSKV EKAYVPLTG<br>100 TVEGRFAMK KGRQEQRRR TEERERRR QIMLEKRIQ RELAKRAEQI                                                                                                                                                                                                                                  |
| sp Q0SGT2 43-575 | ERPRRSREKQRREQYIREKWNRRQEKEMLASDEEDVSKVEKAYVPLTGTV<br>KGRFAMKQKQEQRRRTEERERRRQIMLEKRIQRELAKRAEQIKDINNTGTSSS<br>EGDCSLLITVTVVRYTSGEMKKNFDELEKRRERKIFYEKRIKRYEQRPSKKA<br>KCLSIYKCHIESEAKKELSGLLILFHELEKQEQRRKQAREKARLREKKAAT<br>KARPQVYNEDEKNDQAKIFKGVRFKLLKLSFEKRRQRRDEKKAERARRIEKKE<br>AFKASRMVVDKSPENVTISQFLPQKLEINFEKLLQKMEKERRTEERKMKLE<br>MEKQEFQLRQKMEKKEENETFGLSREYELIFKRSQSIQAKNLSKFEKIGQLSEK |
| NM_144573.3      | 361 tatgtaccaa accttggcaa gggtagtata aaggataagt tgaagccat gaagagagcc<br>421 agggagaaa gaatacaag gactctaga gacgaanao aagagaaa agacaatat<br>481 attagagaga gagaatgaa caggagaag caggagata aagaatgct tgctctgat<br>541 gatgagaaq atgtaktctc taagtagaa aaggttatg tttcaaat acaggaaact                                                                                                                       |

The nonsynonymous variant NEXN c.154G>C, p.Asp52His was classified as variant of unknown significance (VUS). It is present in both brothers and their mother.
